# Supplementary material for: Facile synthesis of Y4O(OH)9NO3:Eu3+/Y2O3:Eu3+nanotubes and nanobundles from nanolamellar precursors
Source: Royal Society of Chemistry journal article supplement (doi:10.1039/b912665a), 2009-10-07
Supplement: b912665a.pdf [file b912665a.pdf]

### Supporting Information

**Figure S1.** FT-IR spectrum of sample **S4**.

**Figure S2.** Low- and high-magnification SEM images of **S1** (a, b) and **S4** (c, d), respectively.

**Figure S3.** XPS spectra of sample **S4**. (a) survey spectrum; (b, c) core-level spectra of C 1s and N 1s.

**Figure S4.** XRD patterns of the as-synthesized samples obtained at different reaction stages (6, 8 and 12 h) at 180 °C with the identical solvent for synthesizing **S3**.

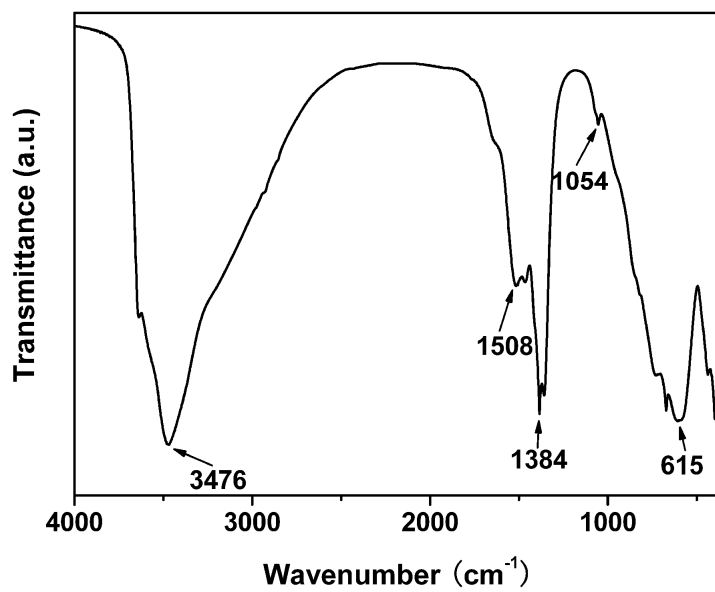

Figure S1.

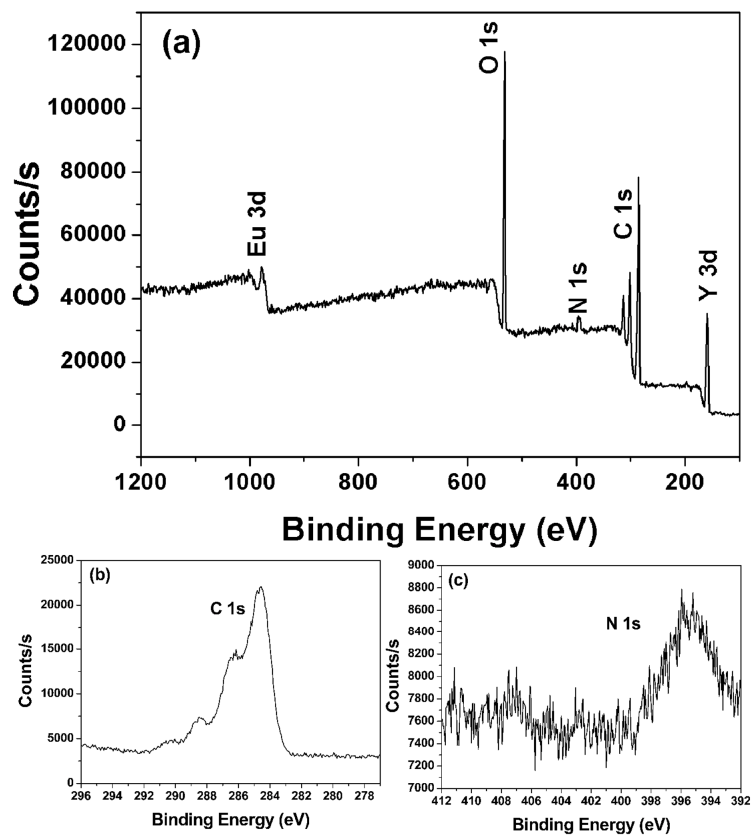

Figure S2.

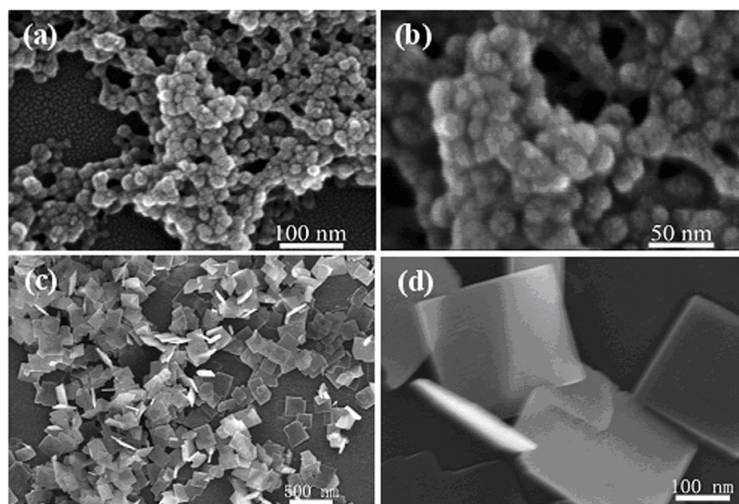

**Figure S3.**

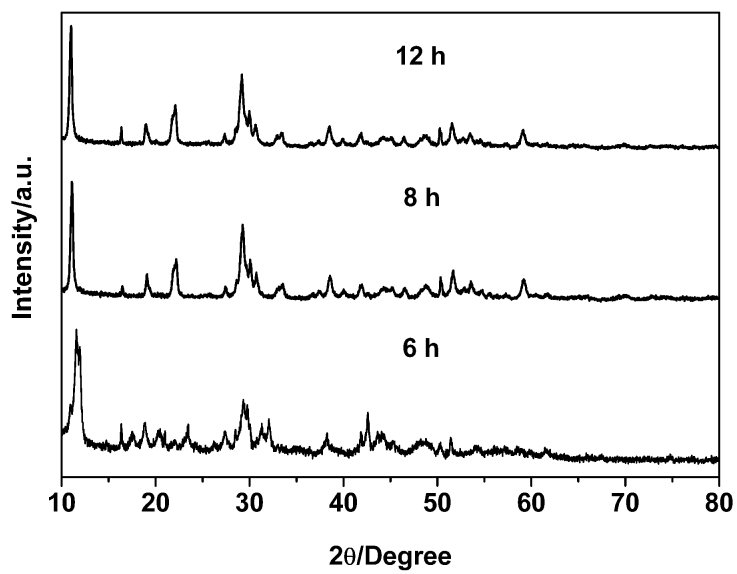

Figure S4.
